# Supplementary material for: SP142 PD-L1 Assays in Multiple Samples from the Same Patients with Early or Advanced Triple-Negative Breast Cancer
Source: MDPI journal article supplement (doi:10.3390/cancers14133042), 2022-06-21
Supplement: s1 [file s1]

**Table S1.** Clinical and pathological characteristics of patients with early triple-negative breast cancer.

| Variables                                             | The Upfront Surgery Group ( <i>n</i> = 47) | The NACT Group ( <i>n</i> = 30) |
|-------------------------------------------------------|--------------------------------------------|---------------------------------|
| Age (median, range)                                   | 58.0 (29–87)                               | 47.9 (30–67)                    |
| Histologic type                                       |                                            |                                 |
| IDC                                                   | 40 (85.1%)                                 | 28 (93.3%)                      |
| ILC                                                   | 2 (4.3%)                                   | 0 (0%)                          |
| Others <sup>a</sup>                                   | 5 (10.6%)                                  | 2 (6.7%)                        |
| Clinical T stage, %                                   |                                            |                                 |
| T1                                                    | 26 (55.3%)                                 | 3 (10%)                         |
| T2-4                                                  | 21 (44.7%)                                 | 27 (90%)                        |
| Clinical N stage, %                                   |                                            |                                 |
| N0                                                    | 45 (95.7%)                                 | 12 (40%)                        |
| N1-3                                                  | 2 (4.3%)                                   | 18 (60%)                        |
| Histologic Grade in Biopsy, %                         |                                            |                                 |
| Grade I                                               | 1 (2.1%)                                   | 0 (0%)                          |
| Grade II                                              | 35 (74.5%)                                 | 11 (36.7%)                      |
| Grade III                                             | 11 (23.4%)                                 | 19 (63.3%)                      |
| Pathologic T stage                                    |                                            |                                 |
| T1                                                    | 31 (66%)                                   | 21 (70%)                        |
| T2-4                                                  | 16 (34%)                                   | 9 (30%)                         |
| Pathologic N stage                                    |                                            |                                 |
| N0                                                    | 41 (87.2%)                                 | 26 (86.7%)                      |
| N1-3                                                  | 6 (12.8%)                                  | 4 (13.3%)                       |
| Histologic Grade in surgical specimen, %              |                                            |                                 |
| Grade I                                               | 0 (0%)                                     | 0 (0%)                          |
| Grade II                                              | 26 (55.3%)                                 | 15 (50%)                        |
| Grade III                                             | 21 (44.7%)                                 | 15 (50%)                        |
| TIL % at baseline at biopsy, (median, range)          | 25.43 (0–100)                              | 33.55 (0–90)                    |
| TIL % at baseline at surgical sample, (median, range) | 30.32 (0–100)                              | 12.1 (0–50)                     |
| Ki67 labelling index (median, range)                  | 41.62 (2.72–90.0)                          | 43.15 (0–90)                    |
| Neoadjuvant chemotherapy regimen                      |                                            |                                 |
| AC                                                    | -                                          | 2 (6.7%)                        |
| AC followed Taxane                                    | -                                          | 26 (86.7%)                      |
| Others <sup>b</sup>                                   | -                                          | 2 (6.7%)                        |

a, upfront) Medullary 1, Cribriform 1, Metaplastic 1, Combined 2, NACT) Metaplastic 1, Combined 1. b. One is AC followed TC, the other is AC followed TP. Abbreviation: IDC, Invasive ductal carcinoma; ILC, Invasive lobular carcinoma; TILs, Tumor-infiltrating lymphocytes; AC, Anthracycline plus Cyclophosphamide; TC, Taxotere and Cyclophosphamide; TP, Paclitaxel plus Cisplatin.

**Table S2.** Metastatic TNBC patients who taken multiple PD-L1 test ( $n = 12$ ).

| Variables                          | Total patients<br>( $n = 12$ ) |
|------------------------------------|--------------------------------|
| Age (Median, range)                | 45.7 (29–72)                   |
| Metastasis status                  |                                |
| recurrent and/or metastatic        | 11 (91.7%)                     |
| de novo stage IV                   | 1 (8.3%)                       |
| Clinical T stage, %                |                                |
| T1                                 | 4 (33.3%)                      |
| T2                                 | 6 (50.0%)                      |
| T4                                 | 2 (16.7%)                      |
| Clinical N stage, %                |                                |
| N0                                 | 3 (25.0%)                      |
| N1-3                               | 9 (75.0%)                      |
| Neoadjuvant CTx.                   |                                |
| Yes                                | 8 (66.7%)                      |
| No                                 | 4 (33.3%)                      |
| Operation Method (N=12)            |                                |
| BCS                                | 5 (41.7%)                      |
| TM                                 | 6 (50.0%)                      |
| No surgery (de novo)               | 1 (8.3%)                       |
| RCB index (N=8)                    |                                |
| 0                                  | 2 (25.0%)                      |
| 1                                  | 0 (0%)                         |
| 2                                  | 3 (37.5%)                      |
| 3                                  | 3 (37.5%)                      |
| Adjuvant Chemotherapy              |                                |
| Yes                                | 8 (66.7%)                      |
| No <sup>a</sup>                    | 4 (33.3%)                      |
| Metastasis area                    |                                |
| Locoregional                       | 1 (8.3%)                       |
| Distant                            | 7 (58.3%)                      |
| Locoregional with Distant          | 4 (33.3%)                      |
| Locoregional metastasis site (N=5) |                                |
| Ipsilateral breast                 | 1 (20%)                        |
| Axilla, solitary                   | 1 (20%)                        |
| Axilla, multiple                   | 2 (40%)                        |
| Internal mammary node              | 1 (20%)                        |
| Distant metastasis site (N=11)     |                                |
| Lung                               | 5 (45.5%)                      |
| Liver                              | 2 (18.2%)                      |
| Bone                               | 2 (18.2%)                      |
| Brain                              | 1 (9.1%)                       |
| Multiple                           | 1 (9.1%)                       |

a. including palliative chemotherapy (de novo). Abbreviation: TNBC, Triple-negative breast cancer; CTx, Chemotherapy; BCS, Breast-conserving surgery; TM, Total mastectomy; RCB, Residual Cancer Burden.

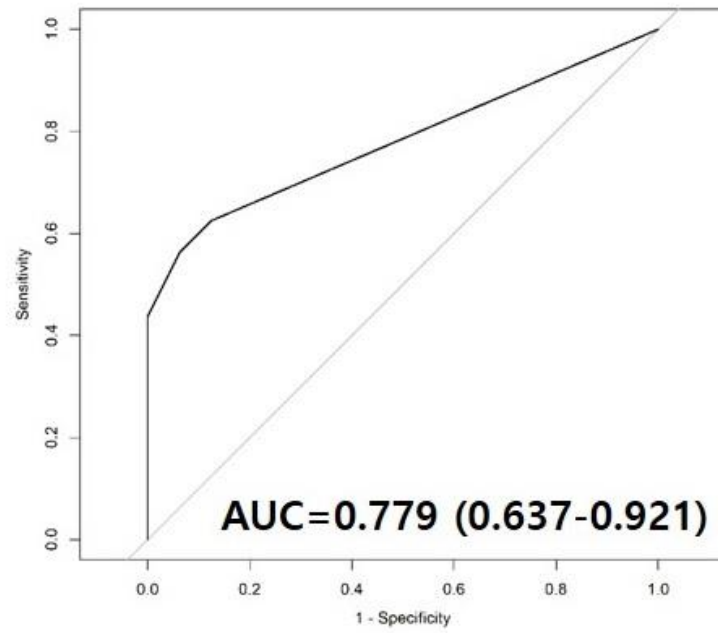

**Figure S1.** ROC curve predicting PD-L1 positive shift when 20% is set as the optimal cut-off of TIL. The AUC for the TIL score was 0.779 (95% CI 0.637-0.921). Abbreviation: ROC, Receiver operating characteristic; TIL, Tumor-infiltrating lymphocytes; AUC, Area under the curve
